# Supplementary material
Source: PubMed Central journal article supplement (PMC2993838)
Supplement: NIHMS249076-supplement-1_si_001.pdf [file NIHMS249076-supplement-1_si_001.pdf]

# Supporting Information

## The Bis( $\mu$ -oxo) Dicopper(III) Species of the Simplest Peralkylated Diamine: Enhanced Reactivity towards Exogenous Substrates

Peng Kang,<sup>[a]</sup> Elena Bobyr,<sup>[a]</sup> John Dustman,<sup>[a]</sup> Keith O. Hodgson,<sup>[a,b]\*</sup> Britt Hedman,<sup>[b]\*</sup>

Edward I. Solomon,<sup>[a]\*</sup> and T. Daniel. P. Stack<sup>[a]\*</sup>

[a] Department of Chemistry, Stanford University, Stanford, California 94305

[b] Stanford Synchrotron Radiation Lightsource, SLAC, Stanford University, Menlo Park, California  
94025

### I. Full Gaussian 03 Reference

Frisch, M. J.; Trucks, G. W.; Schlegel, H. B.; Scuseria, G. E.; Robb, M. A.; Cheeseman, J. R.; Montgomery, Jr., J. A.; Vreven, T.; Kudin, K. N.; Burant, J. C.; Millam, J. M.; Iyengar, S. S.; Tomasi, J.; Barone, V.; Mennucci, B.; Cossi, M.; Scalmani, G.; Rega, N.; Petersson, G. A.; Nakatsuji, H.; Hada, M.; Ehara, M.; Toyota, K.; Fukuda, R.; Hasegawa, J.; Ishida, M.; Nakajima, T.; Honda, Y.; Kitao, O.; Nakai, H.; Klene, M.; Li, X.; Knox, J. E.; Hratchian, H. P.; Cross, J. B.; Bakken, V.; Adamo, C.; Jaramillo, J.; Gomperts, R.; Stratmann, R. E.; Yazyev, O.; Austin, A. J.; Cammi, R.; Pomelli, C.; Ochterski, J. W.; Ayala, P. Y.; Morokuma, K.; Voth, G. A.; Salvador, P.; Dannenberg, J. J.; Zakrzewski, V. G.; Dapprich, S.; Daniels, A. D.; Strain, M. C.; Farkas, O.; Malick, D. K.; Rabuck, A. D.; Raghavachari, K.; Foresman, J. B.; Ortiz, J. V.; Cui, Q.; Baboul, A. G.; Clifford, S.; Cioslowski, J.; Stefanov, B. B.; Liu, G.; Liashenko, A.; Piskorz, P.; Komaromi, I.; Martin, R. L.; Fox, D. J.; Keith, T.; Al-Laham, M. A.; Peng, C. Y.; Nanayakkara, A.; Challacombe, M.; Gill, P. M. W.; Johnson, B.; Chen, W.; Wong, M. W.; Gonzalez, C.; and Pople, J. A., *Gaussian 03, Revision C.02*. Gaussian, Inc.: Wallingford, CT, 2004.

### II. Titration of the O species with FcCOOH

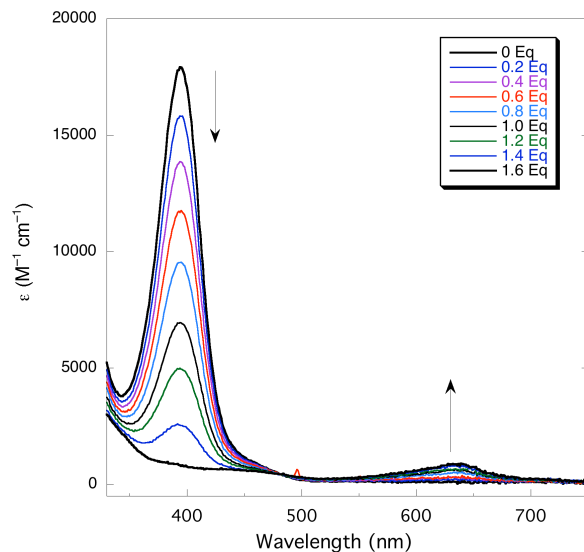

**Figure S1.** Titration of the TMED **O** species with ferrocene monocarboxylic acid (FcCOOH). Two equivalents of FcCOOH would correspond to the full formation of the **O** species. The feature at ca. 650 nm is due to the ferrocenium carboxylate zwitterion that is formed.

### III. X-ray Absorption Spectroscopy

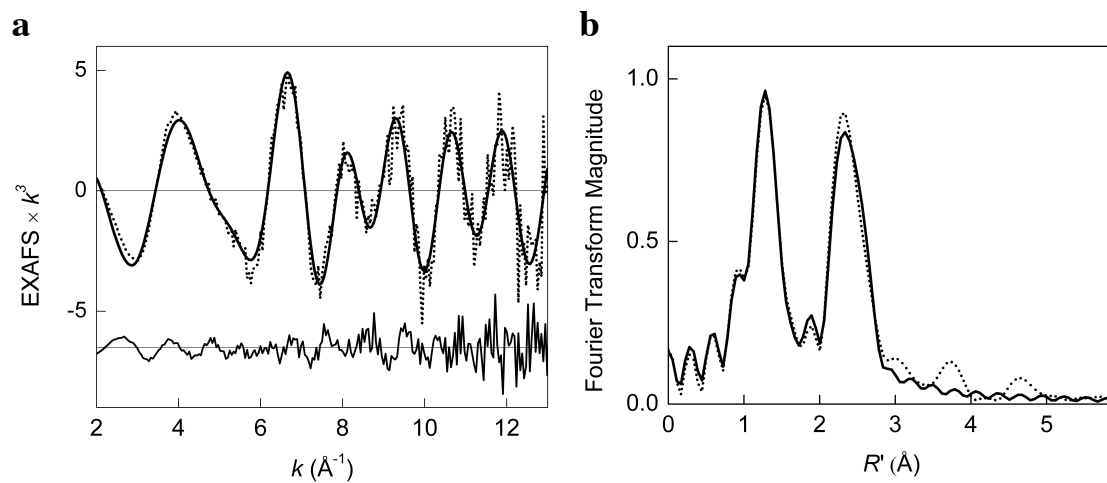

**Figure S2.** (a) Cu K-edge  $k^3$ -weighted EXAFS data for **O**(CF<sub>3</sub>SO<sub>3</sub>)<sub>2</sub> (top) with offset fit residual (bottom) and (b) corresponding nonphase shift corrected Fourier transforms. Data (····); fit (—).

**Table S1.** EXAFS Fit Results for **O**(SbF<sub>6</sub>)<sub>2</sub> and **O**(CF<sub>3</sub>SO<sub>3</sub>)<sub>2</sub>.<sup>a</sup>

| Sample                                                   |      | $R$ (Å) | $\sigma^2$ (Å <sup>2</sup> ) | $\Delta E_0$ (eV) | $F^b$ |
|----------------------------------------------------------|------|---------|------------------------------|-------------------|-------|
| <b>O</b> (SbF <sub>6</sub> ) <sub>2</sub>                | 2 O  | 1.80    | 0.0038                       | -10.6             | 0.250 |
|                                                          | 2 N  | 1.96    | 0.0041                       |                   |       |
|                                                          | 1 Cu | 2.74    | 0.0026                       |                   |       |
|                                                          | 6 C  | 2.77    | 0.0207                       |                   |       |
| <b>O</b> (CF <sub>3</sub> SO <sub>3</sub> ) <sub>2</sub> | 2 O  | 1.80    | 0.0032                       | -11.2             | 0.358 |
|                                                          | 2 N  | 1.96    | 0.0030                       |                   |       |

|      |      |        |
|------|------|--------|
| 1 Cu | 2.75 | 0.0025 |
| 6 C  | 2.76 | 0.0217 |

<sup>a</sup> All fits were performed over the  $k$  range of 2-13 Å<sup>-1</sup>. The estimated uncertainty in  $R$  is  $\pm 0.02$  Å; the uncertainty in  $N$  is  $\sim 25\%$ . <sup>b</sup> The goodness of the fit is defined as  $F = [\Sigma(k^6(\chi_{\text{exptl}} - \chi_{\text{calcd}})^2)/(\Sigma k^6 \chi_{\text{exptl}}^2)]^{1/2}$ .

#### IV. Thermal Decomposition Kinetics

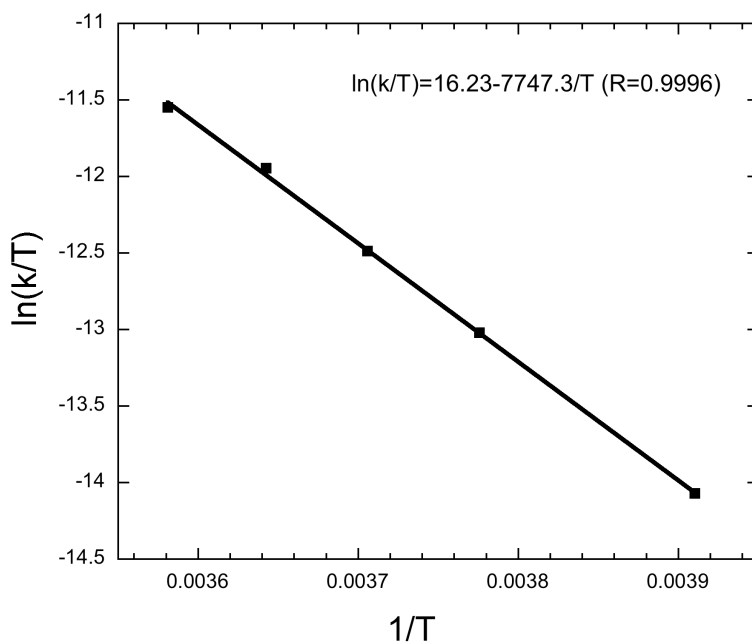

**Figure S3.** Eyring plot of the decomposition kinetics of the TMED **O** species (acetone, [Cu] = 1mM, CF<sub>3</sub>SO<sub>3</sub><sup>-</sup>).

#### V. DFT

**Table S2.** Mulliken population analysis of selected MOs of the TMED **O** species

| MO     | Energy (eV) | %Cu | %O | %N | %Rest |
|--------|-------------|-----|----|----|-------|
| LUMO+1 | -9.74       | 36  | 35 | 23 | 6     |
| LUMO   | -9.88       | 35  | 44 | 16 | 6     |
| HOMO-1 | -13.95      | 7   | 40 | 36 | 17    |
| HOMO-5 | -14.99      | 11  | 24 | 27 | 38    |

**Table S3.** Cartesian coordinates of DFT-optimized D<sub>2</sub> conformation of the **O** species (B3LYP/6-31g(d), gas phase)

|    |             |            |            |
|----|-------------|------------|------------|
| Cu | -1.36137400 | 0.00000000 | 0.00000000 |
| Cu | 1.36137400  | 0.00000000 | 0.00000000 |

|   |             |             |             |
|---|-------------|-------------|-------------|
| O | 0.00000000  | 1.15530200  | 0.00000000  |
| O | 0.00000000  | -1.15530200 | 0.00000000  |
| N | -2.74659700 | -1.37297700 | 0.05291100  |
| N | -2.74659700 | 1.37297700  | -0.05291100 |
| N | 2.74659700  | 1.37297700  | 0.05291100  |
| N | 2.74659700  | -1.37297700 | -0.05291100 |
| C | -4.04685700 | 0.70306800  | 0.28886200  |
| C | -2.46719300 | -2.49110600 | -0.89356300 |
| C | -2.46719300 | 2.49110600  | 0.89356300  |
| C | 4.04685700  | 0.70306800  | -0.28886200 |
| C | 4.04685700  | -0.70306800 | 0.28886200  |
| C | 2.46719300  | 2.49110600  | -0.89356300 |
| C | -2.73953700 | -1.89706100 | 1.45255200  |
| C | -2.73953700 | 1.89706100  | -1.45255200 |
| C | 2.46719300  | -2.49110600 | 0.89356300  |
| C | 2.73953700  | 1.89706100  | 1.45255200  |
| C | 2.73953700  | -1.89706100 | -1.45255200 |
| C | -4.04685700 | -0.70306800 | -0.28886200 |
| H | -4.13136100 | 0.68153200  | 1.37833400  |
| H | -4.88798900 | 1.29219100  | -0.09406300 |
| H | 4.88798900  | 1.29219100  | 0.09406300  |
| H | 4.13136100  | 0.68153200  | -1.37833400 |
| H | 4.13136100  | -0.68153200 | 1.37833400  |
| H | 4.88798900  | -1.29219100 | -0.09406300 |
| H | 3.48679600  | 2.69116900  | 1.55820200  |
| H | 1.74704200  | 2.29430000  | 1.66878400  |
| H | 2.96801900  | 1.09887500  | 2.16230900  |
| H | 3.48679600  | -2.69116900 | -1.55820200 |
| H | 2.96801900  | -1.09887500 | -2.16230900 |
| H | 1.74704200  | -2.29430000 | -1.66878400 |
| H | -1.74704200 | -2.29430000 | 1.66878400  |
| H | -3.48679600 | -2.69116900 | 1.55820200  |
| H | -2.96801900 | -1.09887500 | 2.16230900  |
| H | -1.74704200 | 2.29430000  | -1.66878400 |
| H | -2.96801900 | 1.09887500  | -2.16230900 |
| H | -3.48679600 | 2.69116900  | -1.55820200 |
| H | 2.44559200  | -2.11062200 | 1.91717700  |
| H | 3.25033000  | -3.25250700 | 0.80669900  |
| H | 1.49734500  | -2.92416900 | 0.65072000  |
| H | 2.44559200  | 2.11062200  | -1.91717700 |
| H | 1.49734500  | 2.92416900  | -0.65072000 |
| H | 3.25033000  | 3.25250700  | -0.80669900 |
| H | -2.44559200 | 2.11062200  | 1.91717700  |
| H | -3.25033000 | 3.25250700  | 0.80669900  |
| H | -1.49734500 | 2.92416900  | 0.65072000  |
| H | -2.44559200 | -2.11062200 | -1.91717700 |
| H | -3.25033000 | -3.25250700 | -0.80669900 |
| H | -1.49734500 | -2.92416900 | -0.65072000 |
| H | -4.88798900 | -1.29219100 | 0.09406300  |
| H | -4.13136100 | -0.68153200 | -1.37833400 |
